# Supplementary material
Source: PubMed Central journal article supplement (PMC5257269)
Supplement: NIHMS69528-supplement-2.pdf [file NIHMS69528-supplement-2.pdf]

| Blocking Mab;<br>mean % binding<br>inhibition (n) | Isotype<br>controls | Anti<br>siglec 1 | Anti<br>Siglec 3 | Anti<br>Siglec 7 | Anti<br>Siglec 9 | Anti<br>CD45 | Anti<br>CD36 | Anti<br>TGFβRII |
|---------------------------------------------------|---------------------|------------------|------------------|------------------|------------------|--------------|--------------|-----------------|
| Monocytes                                         | 0 (12)              | 0 (3)            | 18 (3)           | 4 (3)            | <b>86</b> (7)    | 0 (3)        | 0 (2)        | 0 (2)           |
| MCSF MΦ                                           | 0 (9)               | 0 (3)            | 12 (3)           | 3 (3)            | <b>87</b> (4)    | 0 (3)        | 0 (2)        | 0 (2)           |

**Supplementary Table 1** Table summarizing the mean % inhibition of MUC1-ST binding by the indicated antibodies (10µg/ml) to monocytes and MCSF MΦ (n number in brackets). % calculated by change in corrected MFI.

| Assay Type | Antigen          | Company         | Clone / Cat. No / name | Dilution / conc        | Ref. |
|------------|------------------|-----------------|------------------------|------------------------|------|
| N / FC     | Siglec-1         | Abcam           | Hsn 7D2                | 10µg/ml                | 51   |
| N          | Siglec-3         | Bio-techne      | 6C5/2                  | 10µg/ml                | 52   |
| N          | Siglec-7         | Bio-techne      | AF1138                 | 10µg/ml                | 53   |
| N / ELISA  | Siglec-9         | Bio-techne      | 191240                 | 10µg/ml                | 54   |
| N          | CD36             | Santa Cruz      | H-300                  | 10µg/ml                | 55   |
| N          | TGFβRII          | Bio-techne      | AF-241                 | 10µg/ml                | 56   |
| N          | CD45             | Biolegend       | HI30                   | 10µg/ml                | 57   |
| N          | IL-6Rα           | Roche           | Tocilizumab            | 10µg/ml                | 58   |
| N          | PD-1             | Merck           | Pembrolizumab          | 10µg/ml                | 59   |
| N          | Isotype          | Bio-techne      | AB-105-C               | 10µg/ml                | 60   |
| N          | Isotype          | Bio-techne      | AB-108-C               | 10µg/ml                | 61   |
| N; FC; ICC | Isotype          | Bio-techne      | 11711                  | 10µg/ml; 1/100; 1µg/ml | 62   |
| N          | Isotype          | Bio-techne      | 20102                  | 10µg/ml                | 63   |
| FC         | Siglec-3 FITC    | BD              | P67.6                  | 1/100                  | 64   |
| FC         | Siglec-7 PE      | Biolegend       | 6-434                  | 1/100                  | 65   |
| FC         | Siglec-9 PE      | Bio-techne      | 191240                 | 1/100                  | 66   |
| FC         | Siglec-10 PE     | Biolegend       | 5G6                    | 1/100                  | 67   |
| FC         | HLA-DR FITC      | Beckman Coulter | B8.12.2                | 1/100                  | 68   |
| FC         | CD16 FITC        | Biolegend       | B73.1                  | 1/100                  | 69   |
| FC         | CD14 FITC        | BD              | M5E2                   | 1/100                  | 70   |
| FC         | CD69 PE          | Beckman Coulter | TP1.55.3               | 1/100                  | 71   |
| FC         | CD25 FITC        | Biolegend       | BC96                   | 1/100                  | 72   |
| FC         | CD86 PE          | Beckman Coulter | HA5.2B7                | 1/100                  | 73   |
| FC         | CD40 FITC        | BD              | 5C3                    | 1/100                  | 74   |
| FC         | CD83 PE          | Beckman Coulter | HB15a                  | 1/100                  | 75   |
| FC         | CD163 PE         | Biolegend       | GHI/61                 | 1/100                  | 76   |
| FC         | CD45 PC5         | Beckman Coulter | J.33                   | 1/100                  | 77   |
| FC         | CD206 PE         | eBioscience     | 19.2                   | 1/100                  | 78   |
| FC         | PD-L1 PE         | Biolegend       | 29E.2A3                | 1/100                  | 79   |
| ICC        | MUC1             | In house        | HMFG2                  | 1µg/ml                 | 80   |
| IB         | SHP-1            | Santa Cruz      | C-19                   | 1/500                  | 81   |
| IB         | phospho-SHP-1    | Abcam           | Ab51171                | 1/500                  | 82   |
| ELISA      | Phospho-tyrosine | Bio-techne      | 179003                 | 0.75µg/ml              | 83   |

**Supplementary table 2:** List of antibodies. N, neutralization; FC, flow cytometry; ICC, immunocytochemistry; IB, immunoblot;
